# Supplementary material
Source: MDPI journal article supplement (https://www.mdpi.com/2073-4344/11/4/487)
Supplement: s1 [file s1]

## Supporting information

### Material preparation

The metal modified catalysts were prepared as follows. First, the laser pyrolysis-derived titania nanopowder (typically 0.5 g for one batch) was dispersed in 45 ml of distilled water using a rotovibrator stainless steel rod for 10 minutes. Then, 5 ml of aqueous solution containing the dissolved noble metal precursor (~0.025 g  $\text{AgNO}_3$ , ~0.025 g  $\text{H}_2\text{PtCl}_6 \cdot \text{nH}_2\text{O}$  (~38wt.% metallic Pt) or ~0.022 g  $\text{KAuCl}_4$ ) was slowly added to  $\text{TiO}_2$  suspended previously in water. The final step of metal-reduction was carried out by slowly injecting in  $\text{TiO}_2$  suspension with noble metal precursor, 5 ml of aqueous solution containing 0.04 g of freshly dissolved  $\text{NaBH}_4$ . The solid material was recovered by filtration, washed with pure water, dried at 70°C for 8 h and finally homogenized with an agate mortar.

### Elemental composition determined by EDAX analysis

The elemental analysis data derived from EDAX measurements are presented in Table S1.

**Table S1** Elemental composition obtained from EDAX analysis of simple and metal - modified  $\text{TiO}_2$

| Catalyst          | Metal / at% | Ti / at% | O / at% | C / at% | Imp. |
|-------------------|-------------|----------|---------|---------|------|
| $\text{TiO}_2$    | 0           | 31.30    | 67.20   | 0.80    | 0.7  |
| $\text{Ag/TiO}_2$ | 0.04        | 31.75    | 64.31   | 0.40    | 3.5  |
| $\text{Au/TiO}_2$ | 0.01        | 30.82    | 65.53   | 0.44    | 3.2  |
| $\text{Pt/TiO}_2$ | 0.01        | 22.79    | 72.60   | 0.50    | 4.1  |

## XPS analysis

**Table S2** XPS survey of elemental composition of simple and noble metal-modified TiO<sub>2</sub>

| Sample              | C<br>/ at% | O<br>/ at% | Ti<br>/ at % | Cl<br>/ at % | Na<br>/ at % | Au<br>/ at % | Ag<br>/ at % | Pt<br>/ at % |
|---------------------|------------|------------|--------------|--------------|--------------|--------------|--------------|--------------|
| TiO <sub>2</sub>    | 19.20      | 56.70      | 22.34        | 1.76         | -            | -            | -            | -            |
| Ag/TiO <sub>2</sub> | 13.60      | 52.9       | 20.34        | 0.52         | 12.60        | -            | 0.04         | -            |
| Au/TiO <sub>2</sub> | 25.58      | 46.40      | 28.0         | -            | -            | 0.02         | -            | -            |
| Pt/TiO <sub>2</sub> | 14.50      | 48.87      | 17.80        | 5.10         | 13.71        | -            | -            | 0.02         |

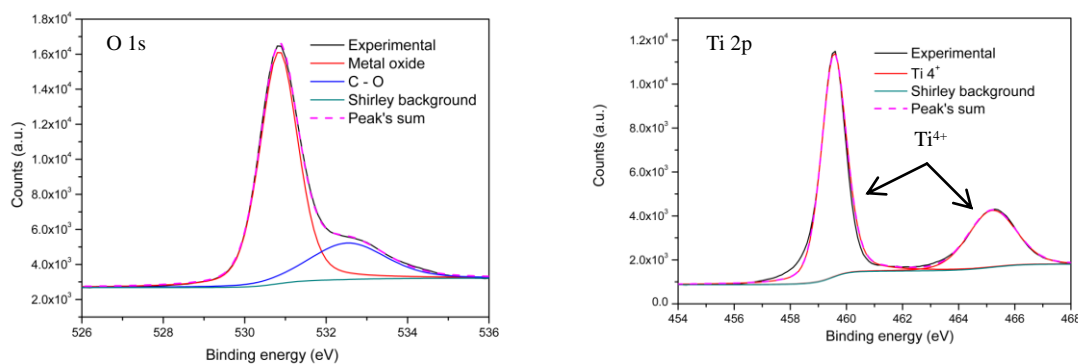

**Fig. S1** High resolution XPS spectra of TiO<sub>2</sub> in O1s and Ti2p binding energy regions.

Figures S1 shows the high resolution XPS spectra of O 1s and Ti 2p core levels of TiO<sub>2</sub> sample. The maxima in O 1s binding energy region is characteristic to O<sup>2-</sup> of TiO<sub>2</sub>. The doublet Ti2p<sub>3/2</sub> (binding energy 459 eV) and Ti 2p<sub>1/2</sub> (binding energy 465 eV) arise from spin orbit splitting. These peaks are consistent with Ti<sup>4+</sup> in TiO<sub>2</sub> lattice.

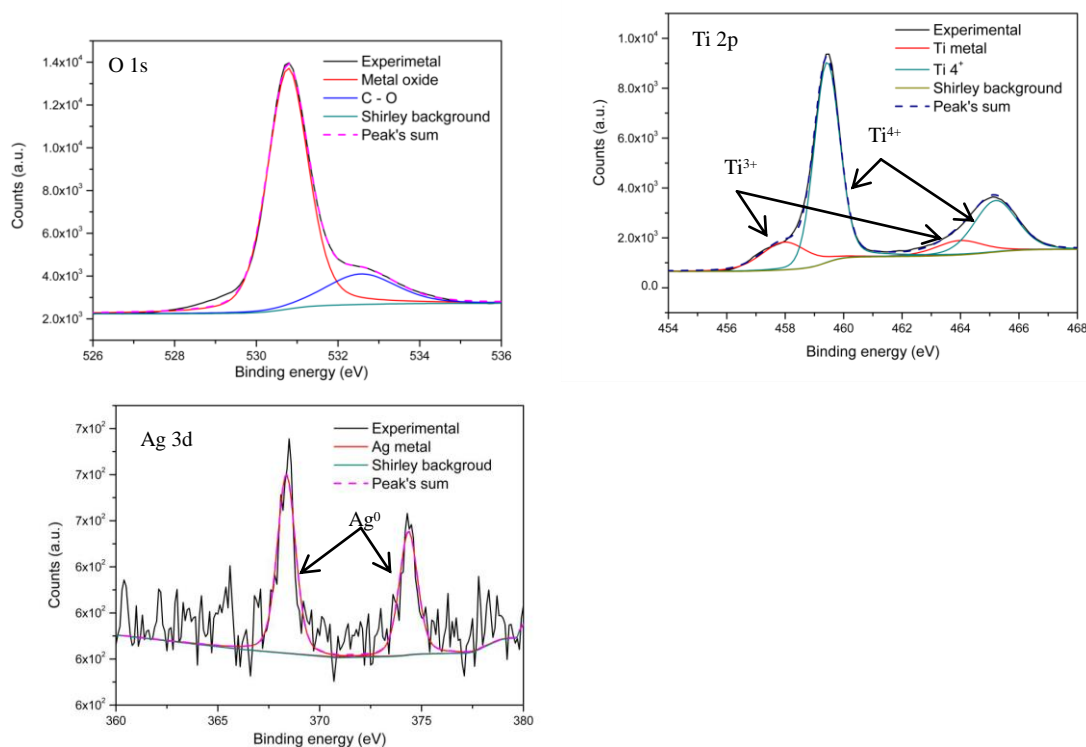

**Fig. S2** High resolution XPS spectra of Ag/TiO<sub>2</sub> in O 1s, Ti 2p and Ag 3d binding energy regions.

From O 1s XPS spectrum of Ag/TiO<sub>2</sub> in Fig. S2 it comes out that, the oxygen is in form of O<sup>2-</sup>. The shoulder Ti2p<sub>1/2</sub> at binding energy 457 eV, observable in all metal-modified samples, corresponds to Ti<sup>3+</sup> species. The concentration of Ti<sup>3+</sup> (at.%) of all investigated samples is given in Table S6. The Ag 3d region in XPS spectrum shows two narrow peaks centred at ~ 366.94 eV (3d<sub>5/2</sub>) and ~ 372.94 eV (3d<sub>3/2</sub>). The literature data points out that the binding energies of Ag<sup>+</sup> and Ag<sup>0</sup> are very close each other, being difficult to discriminate between the metallic and oxidized state [1, 2]. However, from corroboration of TEM and XPS data we can assume that the metallic relative large silver nanoparticles visible in TEM micrographs are in metallic state but their surface is likely to be covered by a thin oxide layer.

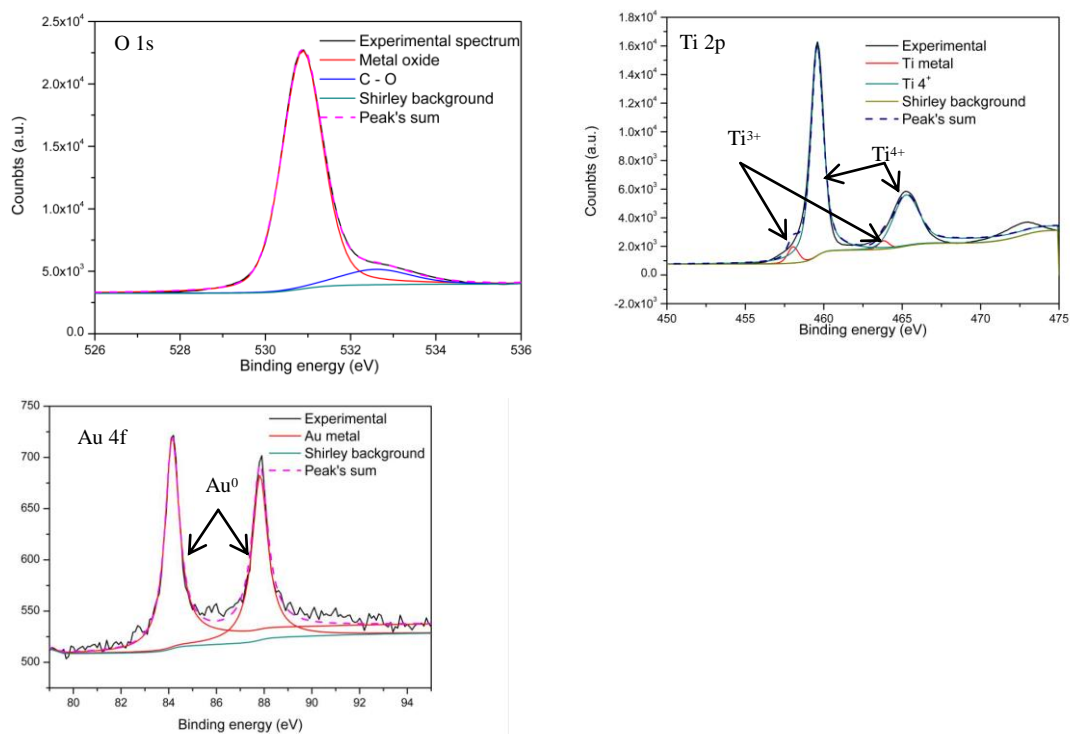

**Fig. S3** High resolution XPS spectra of Au/TiO<sub>2</sub> in O 1s, Ti 2p and Au 4f binding energy regions.

The XPS analysis of Au/TiO<sub>2</sub> sample evidenced the presence of O<sup>2-</sup>, Ti<sup>3+</sup>, Ti<sup>4+</sup> and Au<sup>0</sup> species (see Fig. S3).

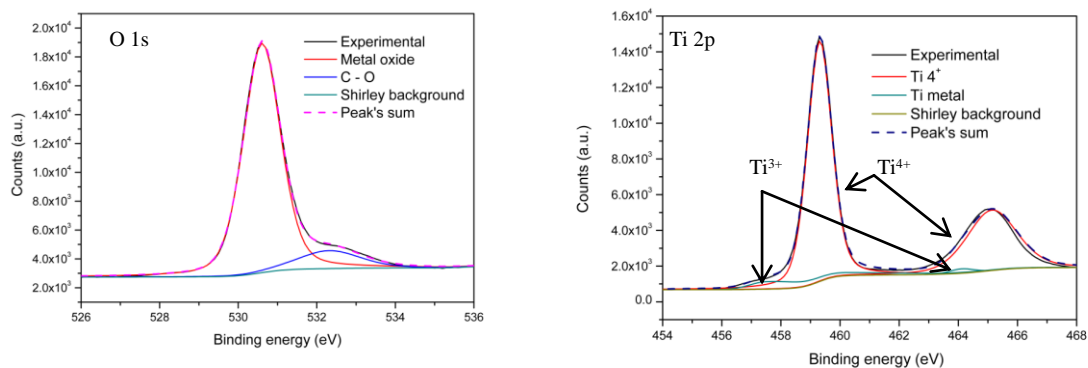

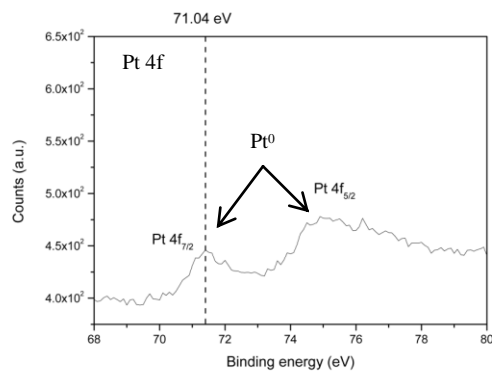

**Fig. S4** High resolution XPS spectra of Pt/TiO<sub>2</sub> in O 1s, Ti 2p and Pt 4f binding energy regions.

The XPS survey of Pt/TiO<sub>2</sub> sample reveals the appearance of O<sup>2-</sup>, Ti<sup>3+</sup>, Ti<sup>4+</sup> and Pt<sup>0</sup> (see Fig. S4). The metals of all investigated samples are in zero oxidation state (see Table S3).

**Table S3** Chemical state of titanium in the investigated materials

| Sample              | Ti <sup>3+</sup> / at. % | Ti <sup>4+</sup> / at. % |
|---------------------|--------------------------|--------------------------|
| TiO <sub>2</sub>    | 0                        | 100                      |
| Ag/TiO <sub>2</sub> | 22.9                     | 77.1                     |
| Au/TiO <sub>2</sub> | 10.9                     | 89.1                     |
| Pt/TiO <sub>2</sub> | 8.8                      | 91.2                     |

From data depicted in Table S4, it comes out that the amount of titanium in its reduced form (Ti<sup>3+</sup>) is variable, depending on the supported metal.

## XRD analysis

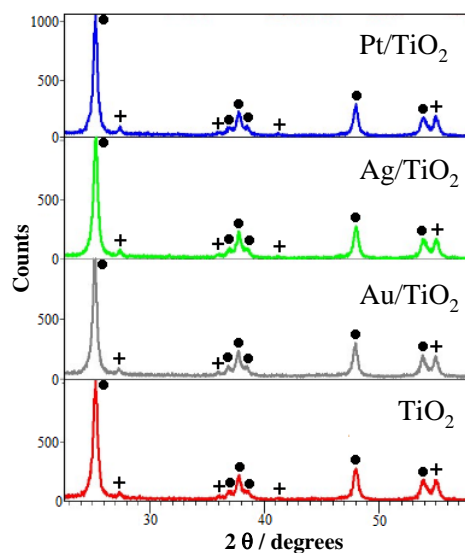

**Fig. S5** Comparative XRD diffraction patterns of simple and metal-modified TiO<sub>2</sub>. •-anatase, +-rutile.

**Table S4** Crystalline phase composition and average crystallite size of simple and metal-modified TiO<sub>2</sub>.

| Catalyst            | Anatase/ at% | Rutile / at% | <sup>a</sup> D(XRD) / nm |
|---------------------|--------------|--------------|--------------------------|
| TiO <sub>2</sub>    | 94.4         | 5.6          | 18.8                     |
| Au/TiO <sub>2</sub> | 95.3         | 4.7          | 19.3                     |
| Ag/TiO <sub>2</sub> | 93.4         | 6.6          | 19.8                     |
| Pt/TiO <sub>2</sub> | 95.1         | 4.9          | 20.6                     |

<sup>a</sup>-average crystallite size calculated from the characteristic reflection line of anatase (101) plane ( $2\theta \approx 25^\circ$ ) using Debye – Scherrer equation.

## References

1. X. Wang, S. Li, H. Yu, Jiaguo Yu, S. Liu, "Ag<sub>2</sub>O as a new visible-light photocatalyst: self-stability and high photocatalytic activity", Chem. Eur. J. 17 (2011) 7777 – 7780.

2. R. Kumar , R. M. El-Shishtawy, M. A. Barakat, "Synthesis and characterization of Ag-Ag<sub>2</sub>O/TiO<sub>2</sub>@polypyrrole heterojunction for enhanced photocatalytic degradation of methylene blue", Catalysts 6 (2016) 76 (11 pages).
